# Supplementary material for: Evaluation of a Theory-Informed Implementation Intervention for the Management of Acute Low Back Pain in General Medical Practice: The IMPLEMENT Cluster Randomised Trial
Source: PubMed Central journal article supplement (PMC3681882; doi:10.1371/journal.pone.0065471), 2013-06-13
Supplement: pone.0065471.s002.pdf [file pone.0065471.s002.pdf]

**Table S1:** Effect of the intervention on the behavioural constructs for the behaviours 'managing patients without referral for plain x-ray' and 'advising patients to stay active' (adjustment for design strata only)

| Variable                                                  | Follow-up                                     |                                          | Adjusted effect estimate <sup>2</sup> | (95% CI)     | p-value                        |                                              |
|-----------------------------------------------------------|-----------------------------------------------|------------------------------------------|---------------------------------------|--------------|--------------------------------|----------------------------------------------|
|                                                           | Intervention group<br>No. practices (no. GPs) | Control group<br>No. practices (no. GPs) |                                       |              |                                | Intervention group<br>Mean (SD) <sup>1</sup> |
| <b>Managing patients without referral for plain x-ray</b> |                                               |                                          |                                       |              |                                |                                              |
| Behavioural intention (generalised)                       | 34 (41)                                       | 38 (42)                                  | 6.2 (0.67)                            | 5.8 (1.22)   | 0.2 (-0.1, 0.6)                | 0.205                                        |
| Behavioural intention (performance)                       | 34 (41)                                       | 37 (41)                                  | 9.4 (0.77)                            | 8.6 (1.30)   | 0.8* (0.4, 1.1)                | 0.000                                        |
| Attitudes (direct)                                        | 34 (41)                                       | 38 (42)                                  | 6.2 (1.00)                            | 5.8 (0.99)   | 0.4 (-0.0, 0.8)                | 0.066                                        |
| Attitudes (indirect)                                      | 34 (41)                                       | 38 (42)                                  | 5.4 (0.84)                            | 4.8 (0.97)   | 0.4* (0.0, 0.7)                | 0.027                                        |
| Subjective norms (direct)                                 | 34 (41)                                       | 38 (42)                                  | 4.7 (0.88)                            | 4.6 (1.38)   | -0.1* (-0.5, 0.3)              | 0.467                                        |
| Subjective norms (indirect)                               | 34 (41)                                       | 38 (42)                                  | 4.9 (0.86)                            | 4.5 (1.04)   | 0.2* (-0.1, 0.5)               | 0.210                                        |
| Perceived behavioural control (direct)                    | 34 (41)                                       | 38 (42)                                  | 5.3 (1.08)                            | 5.3 (0.94)   | 0.0* (-0.3, 0.4)               | 0.854                                        |
| Perceived behavioural control (indirect)                  | 34 (40)                                       | 38 (42)                                  | 1.4 (7.71)                            | -0.2 (7.91)  | 1.0* (-2.2, 4.2)               | 0.552                                        |
| Beliefs about professional role                           | 34 (41)                                       | 38 (42)                                  | 5.9 (0.95)                            | 5.4 (1.14)   | 0.3 (-0.1, 0.7)                | 0.122                                        |
| Knowledge (No. (%))                                       | 34 (41)                                       | 38 (42)                                  | 31 (76%)                              | 30 (71%)     | 1.21 <sup>1</sup> (0.45, 3.26) | 0.713                                        |
| Beliefs about capabilities (red/yellow flags)             | 34 (41)                                       | 38 (42)                                  | 6.0 (0.95)                            | 5.8 (1.23)   | 0.1* (-0.3, 0.6)               | 0.509                                        |
| Beliefs about capabilities (reassurance)                  | 34 (41)                                       | 38 (42)                                  | 6.0 (0.65)                            | 5.6 (1.06)   | 0.3* (-0.0, 0.6)               | 0.074                                        |
| <b>Advising patients to stay active</b>                   |                                               |                                          |                                       |              |                                |                                              |
| Behavioural intention (generalised)                       | 34 (41)                                       | 38 (42)                                  | 6.4 (0.66)                            | 6.0 (1.24)   | 0.2 (-0.1, 0.5)                | 0.220                                        |
| Behavioural intention (performance)                       | 34 (41)                                       | 38 (42)                                  | 9.5 (1.61)                            | 9.0 (2.08)   | 0.4* (-0.2, 1.1)               | 0.178                                        |
| Attitudes (direct)                                        | 34 (41)                                       | 38 (42)                                  | 6.3 (1.04)                            | 6.3 (0.98)   | -0.1 (-0.5, 0.4)               | 0.806                                        |
| Attitudes (indirect)                                      | 34 (41)                                       | 38 (42)                                  | 5.2 (0.73)                            | 4.9 (0.83)   | 0.2* (-0.1, 0.5)               | 0.195                                        |
| Subjective norms (direct)                                 | 34 (41)                                       | 38 (42)                                  | 4.9 (0.98)                            | 4.6 (1.15)   | 0.2* (-0.1, 0.6)               | 0.233                                        |
| Subjective norms (indirect)                               | 34 (41)                                       | 38 (42)                                  | 4.7 (0.89)                            | 4.4 (1.03)   | 0.3* (-0.1, 0.7)               | 0.104                                        |
| Perceived behavioural control (direct)                    | 34 (41)                                       | 38 (42)                                  | 5.8 (0.81)                            | 5.7 (0.97)   | 0.1* (-0.2, 0.4)               | 0.330                                        |
| Perceived behavioural control (indirect)                  | 34 (41)                                       | 38 (42)                                  | 15.9 (16.66)                          | 13.1 (13.93) | 3.4 (-2.4, 9.1)                | 0.251                                        |
| Beliefs about professional role                           | 34 (41)                                       | 38 (42)                                  | 6.4 (0.62)                            | 6.3 (0.73)   | 0.1 (-0.2, 0.3)                | 0.612                                        |
| Knowledge (No. (%))                                       | 34 (41)                                       | 38 (42)                                  | 39 (95%)                              | 38 (90%)     | 1.67 (0.23, 11.98)             | 0.609                                        |
| Environment context                                       | 34 (41)                                       | 38 (42)                                  | 5.7 (1.25)                            | 5.7 (1.38)   | -0.0* (-0.5, 0.5)              | 0.985                                        |
| Memory                                                    | 34 (41)                                       | 38 (42)                                  | 5.3 (1.50)                            | 5.0 (1.62)   | 0.3 (-0.2, 0.9)                | 0.240                                        |
| Fear-avoidance beliefs                                    | 34 (41)                                       | 38 (42)                                  | 7.6 (4.23)                            | 10.0 (4.10)  | -2.5* (-4.1, -0.9)             | 0.002                                        |

<sup>1</sup> Only general practitioners who provided both baseline and follow-up measures of the behavioural constructs are included in the calculation of the means.

<sup>2</sup> Adjusted difference in means estimated from marginal linear regression models using GEEs with an exchangeable correlation structure and robust variance estimation to allow for clustering within general practices. For models where the estimated within cluster correlation was negative (indicated by \*), the model was refitted assuming an independent correlation structure. All models adjusted for the design strata (number of GPs per practice, location of practice [metropolitan or rural/remote]) and confounders specified prior to undertaking the analysis (age of GP (years), special interest in LBP, baseline measure of the behavioural construct).

<sup>3</sup> Adjusted odds ratio estimated from marginal logistic regression models using GEEs with an exchangeable correlation structure and robust variance estimation to allow for clustering within general practices. For models where the estimated within cluster correlation was negative (indicated by \*), the model was refitted assuming an independent correlation structure. Models adjusted for the same variables as in footnote 1.

**Table S2:** Effect of the intervention on adherence to the guideline for the behaviours x-ray referral, imaging referral, advice re activity and bed rest, as measured by the vignettes (adjustment for design strata only)

| Variable                        | Intervention group      | Control group           | Intervention group adherence |      | Control group adherence |      | Adjusted Odds Ratio <sup>1</sup> | (95% CI)      | p-value |
|---------------------------------|-------------------------|-------------------------|------------------------------|------|-------------------------|------|----------------------------------|---------------|---------|
|                                 | No. practices (no. GPs) | No. practices (no. GPs) | No.                          | (%)  | No.                     | (%)  |                                  |               |         |
| X-ray adherence <sup>2</sup>    | 34 (41)                 | 38 (43)                 | 136/164                      | (83) | 119/172                 | (69) | 2.11                             | (1.21, 3.68)  | 0.009   |
| Imaging adherence <sup>2</sup>  | 34 (41)                 | 38 (43)                 | 129/164                      | (79) | 96/172                  | (56) | 2.96                             | (1.80, 4.88)  | 0.000   |
| Activity adherence <sup>2</sup> | 34 (41)                 | 38 (43)                 | 131/164                      | (80) | 90/172                  | (52) | 3.62                             | (1.72, 7.59)  | 0.001   |
| Bed rest adherence <sup>3</sup> | 34 (41)                 | 38 (43)                 | 163/164                      | (99) | 168/171                 | (98) | 2.91*                            | (0.30, 27.83) | 0.354   |

<sup>1</sup> Adjusted Odds Ratios estimated from logistic models fitted using GEEs with an exchangeable correlation structure and robust variance estimation to allow for clustering within general practices. For models where the estimated within cluster correlation was negative (indicated by \*), the model was refitted assuming an independent correlation structure.

<sup>2</sup> Model adjusted for the design strata (number of GPs per practice, location of practice [metropolitan or rural/remote]).

<sup>3</sup> Model not adjusted for design strata due to limited events of non-adherence.

**Table S3:** Effect of the intervention on imaging referral (adjustment for design strata only)

| Variable                  | Intervention group follow-up <sup>1</sup> |                     | Control group follow-up <sup>2</sup> |                    | Incident rate ratios <sup>3</sup> | (95% CI)     | p-value |
|---------------------------|-------------------------------------------|---------------------|--------------------------------------|--------------------|-----------------------------------|--------------|---------|
|                           | No. referrals                             | Rate/ 1000 patients | No. referrals                        | Rate/1000 patients |                                   |              |         |
| X-ray referral            | 706                                       | 8.6                 | 831                                  | 9.7                | 0.89*                             | (0.65, 1.22) | 0.453   |
| CT-scan referral          | 502                                       | 6.1                 | 553                                  | 6.4                | 0.89                              | (0.63, 1.26) | 0.509   |
| X-ray or CT-scan referral | 1208                                      | 14.7                | 1384                                 | 16.1               | 0.90*                             | (0.69, 1.16) | 0.410   |

<sup>1</sup> No. Practices = 37 and No. GPs = 47; Total number of Medicare patients seen by GPs in intervention group = 82,392.

<sup>2</sup> No. Practices = 39 and No. GPs = 43; Total number of Medicare patients seen by GPs in control group = 85,899.

<sup>3</sup> Incident rate ratios estimated from negative binomial models fitted using GEEs with an exchangeable correlation structure and robust variance estimation to allow for clustering within general practices. For models where the estimated within cluster correlation was negative (indicated by \*), the model was refitted assuming an independent correlation structure. Models adjusted for the design strata (number of GPs per practice, location of practice [metropolitan or rural/remote]).

**Table S4:** Estimates of intra-cluster correlation coefficients (ICC)\*

|                    | ICC   | Bias-corrected (95% CI) |
|--------------------|-------|-------------------------|
| Imaging referral   |       |                         |
| X-ray referral     | 0.004 | (0.003, 0.006)          |
| CT-scan referral   | 0.003 | (0.002, 0.005)          |
| Vignettes          |       |                         |
| X-ray adherence    | 0.048 | (0.000, 0.138)          |
| Imaging adherence  | 0.068 | (0.000, 0.180)          |
| Activity adherence | 0.398 | (0.265, 0.550)          |
| Bed rest adherence | 0.000 | (0.000, 0.051)          |

\* ICC point estimates are calculated from ANOVA. Confidence intervals for the ICCs were bootstrapped using the combination of the bootstrap and loneway commands in Stata [60]. Bootstrapping allowed for clustering of observations within general practices (using both the *cluster()* and *idcluster()* options). Bias corrected 95% confidence intervals were calculated from 1000 replicates. The ANOVA model constrains the ICC to be zero.
